# Supplementary material for: Enhanced CO catalytic oxidation over an Au–Pt alloy supported on TiO2 nanotubes: investigation of the hydroxyl and Au/Pt ratio influences
Source: Royal Society of Chemistry journal article supplement (doi:10.1039/c8cy01642a), 2018-01-01
Supplement: c8cy01642a1.pdf [file c8cy01642a1.pdf]

## Supporting information

### **Enhanced CO catalytic oxidation over Au–Pt alloy supported on TiO<sub>2</sub> nanotubes: investigation of the hydroxyl and Au/Pt ratio influences**

Jing-Jing Li,<sup>a,b</sup> Bao-Lin Zhu<sup>c,\*</sup>, Gui-Chang Wang<sup>a</sup>, Zun-Feng Liu<sup>b</sup>, Wei-Ping Huang<sup>a</sup> and Shou-Min Zhang<sup>a,\*</sup>

<sup>a</sup> College of Chemistry, The Key Laboratory of Advanced Energy Materials Chemistry (Ministry of Education), and Tianjin

Key Lab of Metal and Molecule-based Material Chemistry, Nankai University, Tianjin 300071, China

E-mail: zhangsm@nankai.edu.cn

<sup>b</sup> State Key Laboratory of Medicinal Chemical Biology, College of Pharmacy, Nankai University, Tianjin 300071, China

<sup>c</sup> College of Chemistry, National Demonstration Center for Experimental Chemistry Education (Nankai University), Tianjin

300071, China

E-mail: zhubaolin@nankai.edu.cn

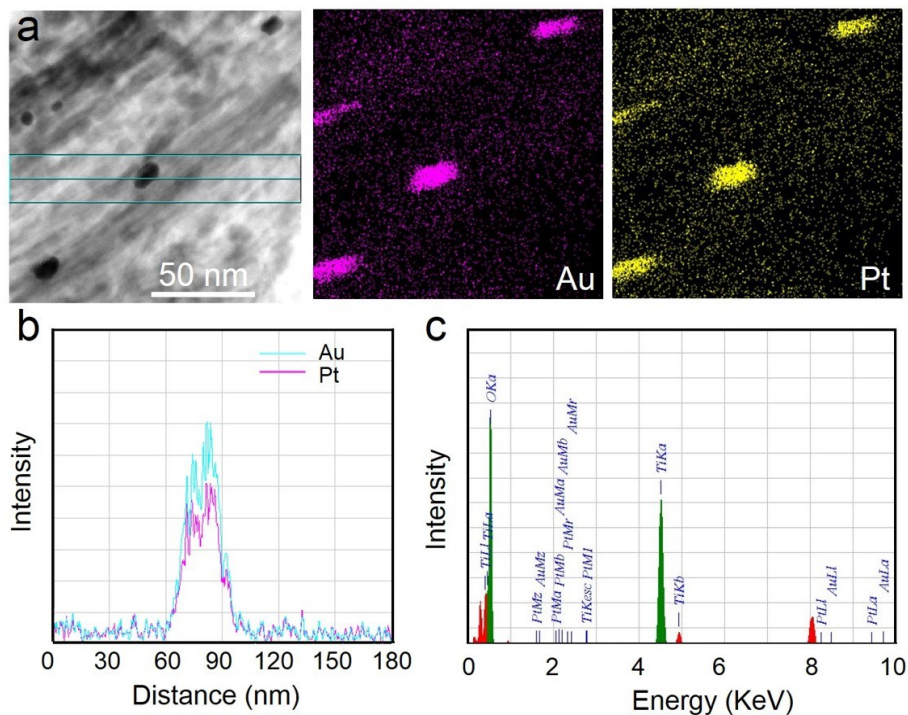

**Fig. S1** (a) HAADF-STEM images of 0.5% Au–0.2% Pt/TiO<sub>2</sub> SNTs catalyst calcined at 400 °C and the corresponding EDX elemental maps (Green plane in (a) represents the EDX plane scan), (b, c) STEM-EDX plane profile and spectrum.

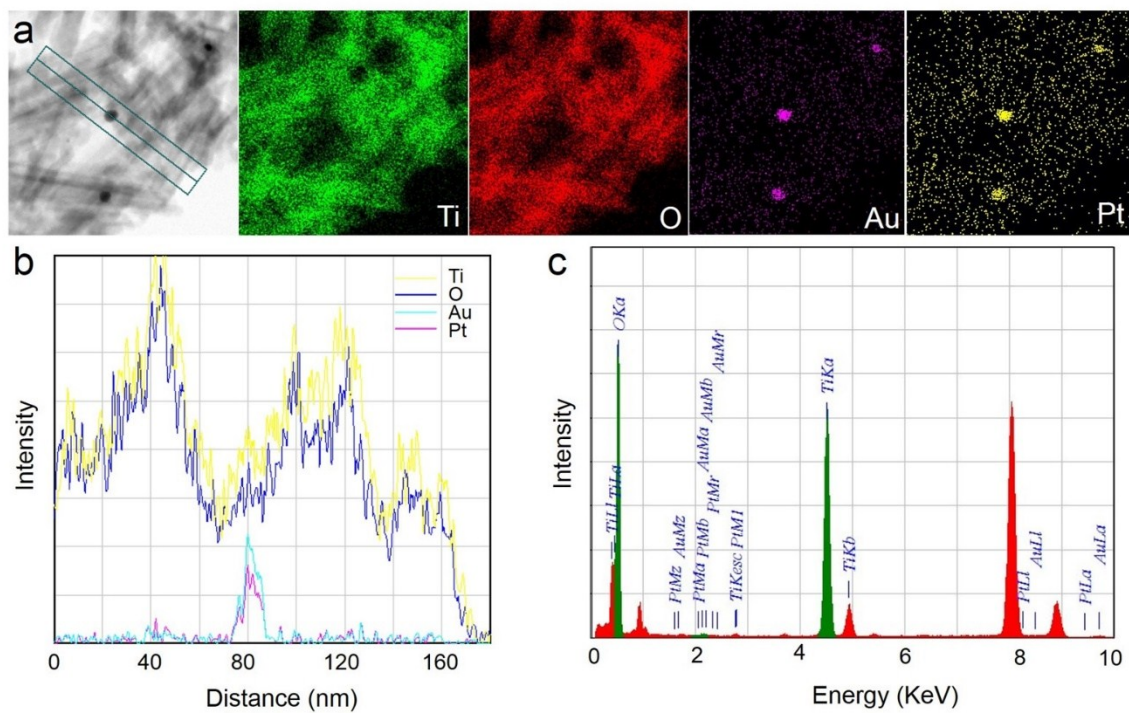

**Fig. S2** (a) HAADF-STEM images of 0.5% Au–0.1% Pt/TiO<sub>2</sub> SNTs catalyst calcined at 300 °C and the corresponding EDX elemental maps. Green plane in (a) represents

the EDX plane scan. (b, c) STEM-EDX plane profile and spectrum.

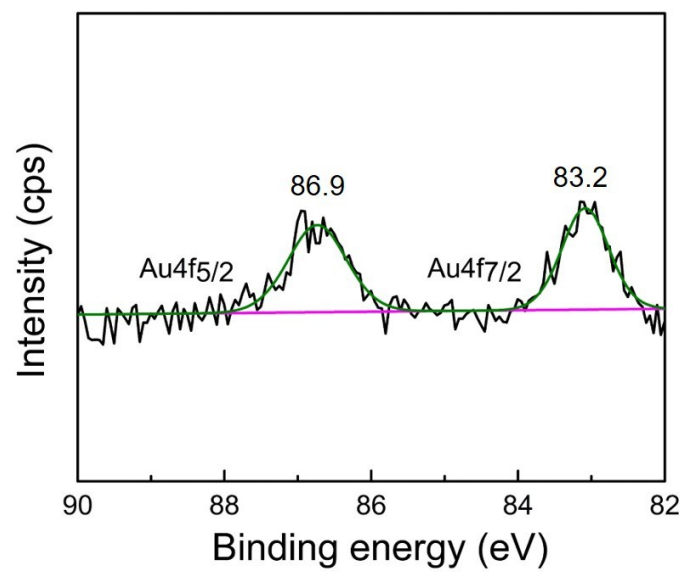

**Fig. S3** High-resolution spectrum of Au 4f for 0.5% Au–0.1% Pt/TiO<sub>2</sub> SNTs catalyst calcined at 300 °C.
